# Supplementary material for: Impact of concurrent aerobic and resistance training on body composition, lipid metabolism and physical function in patients with type 2 diabetes and overweight/obesity: a systematic review and meta-analysis
Source: PeerJ journal article supplement (doi:10.7717/peerj.19537), 2025-06-11
Supplement: Figure_S6.pdf [file Figure_S6.pdf]

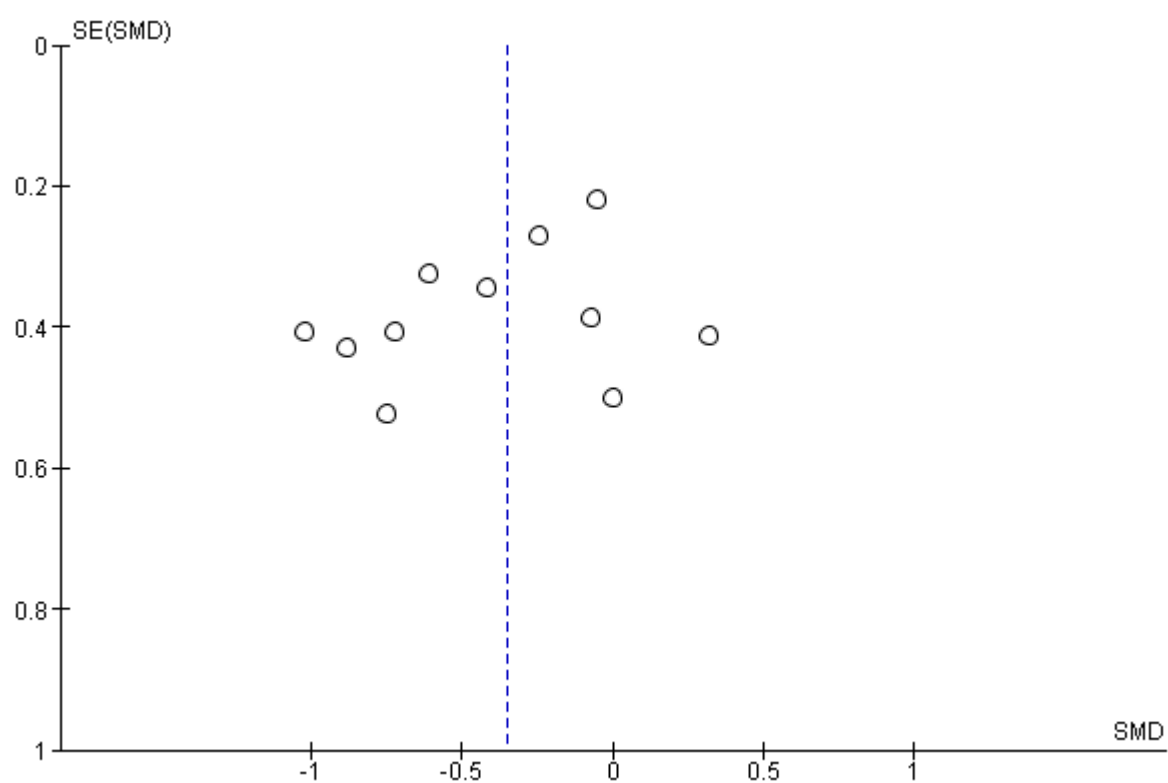

**Figure S6.** Forest plot of the effects of CART on TC.
